# Supplementary material for: Control of the recombination rate by changing the polarity of the electrolyte in dye-sensitized solar cells
Source: Royal Society of Chemistry journal article supplement (doi:10.1039/c4cp03303e), 2014-01-01
Supplement: c4cp03303e1.pdf [file c4cp03303e1.pdf]

## Control of recombination rate by changing the polarity of the electrolyte in Dye-sensitized Solar Cells

Jesús Idígoras, Ramón Tena-Zaera, Juan A. Anta

*Área de Química Física, Departamento de Sistemas Físicos, Químicos y Naturales, Universidad Pablo de Olavide, E-41013, Sevilla, Spain*

*Energy Division, IK4-CIDETEC, Parque Tecnológico de San Sebastián, Paseo Miramón 196, Donostia-San Sebastián 20009, Spain*

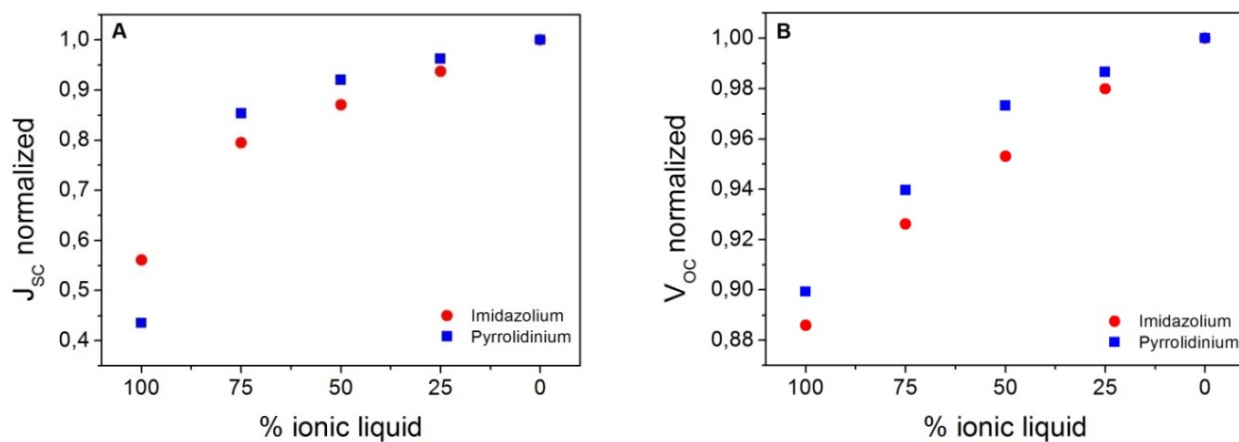

**Figure S1:**  $J_{sc}$  (A) and  $V_{oc}$  (B) for all electrolytes normalized by the  $J_{sc}$  and  $V_{oc}$  obtain in pure acetonitrile-based electrolyte in N719-cells.

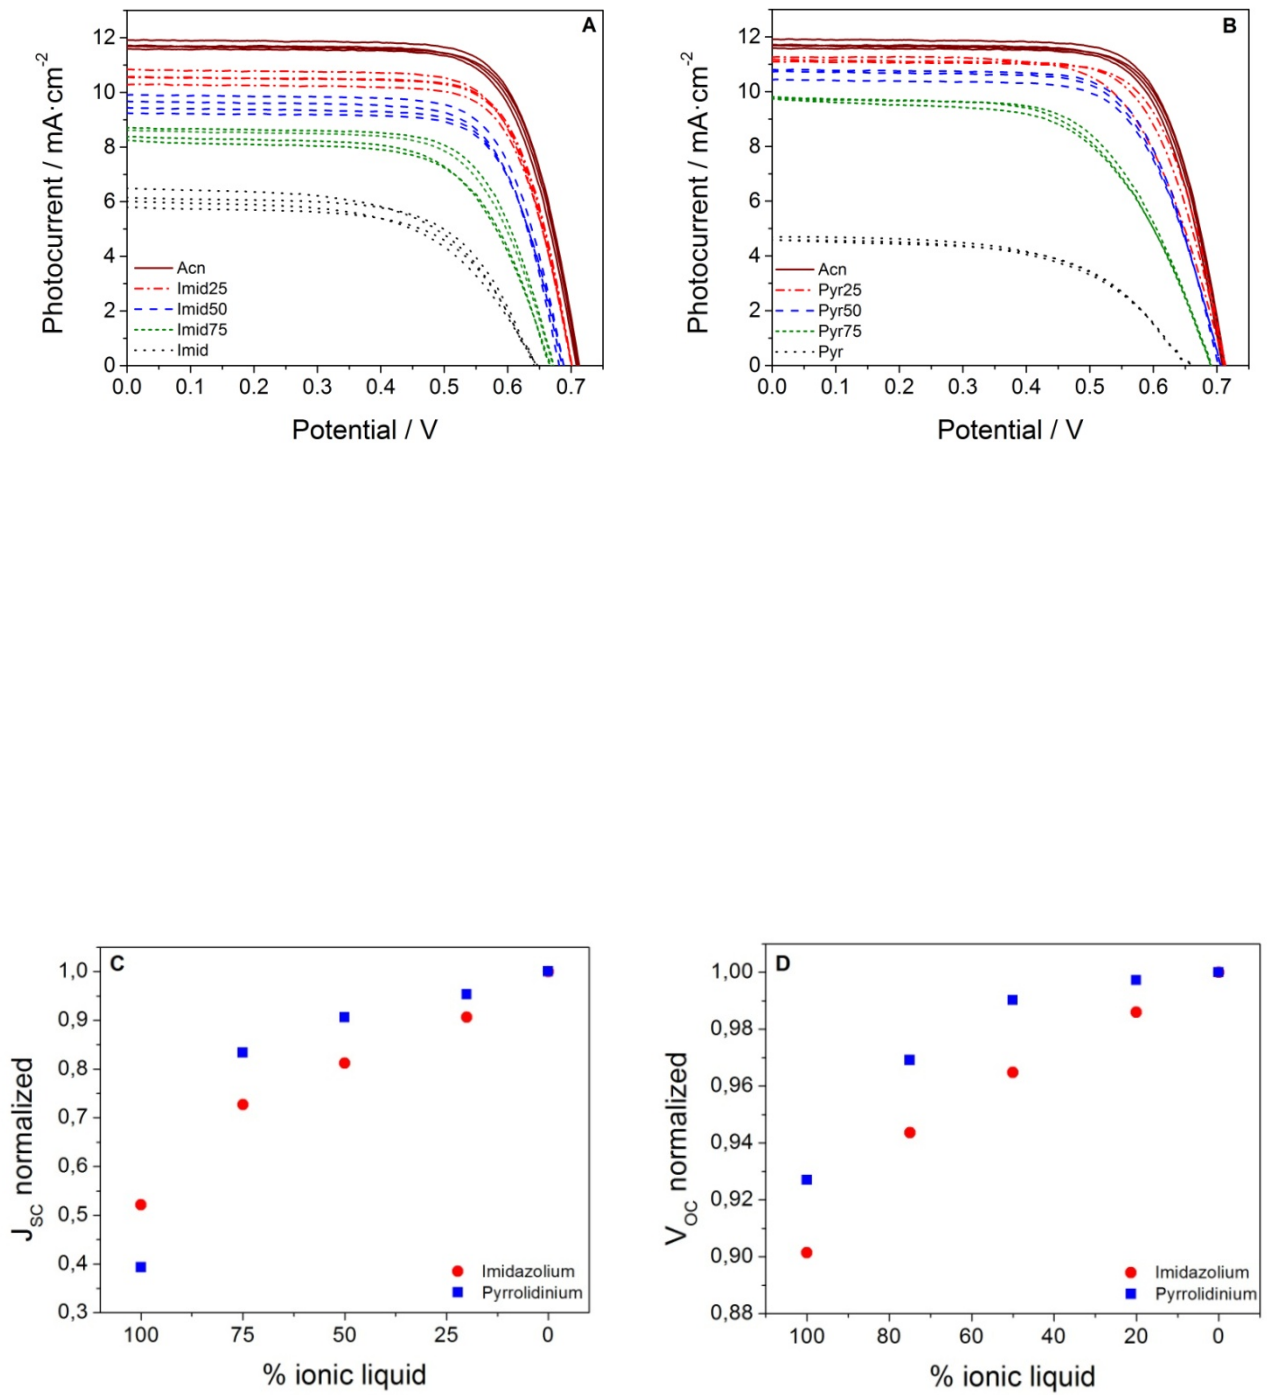

**Figure S2:** Current-voltage curves under 1-sun AM1.5 for all RTIL/Acn mixing ratios for both used ionic liquids: A) Imid and B) Pyr.  $J_{sc}$  (C) and  $V_{oc}$  (D) for all electrolytes normalized by the  $J_{sc}$  and  $V_{oc}$  obtain in pure acetonitrile-based electrolyte in Z907-cells

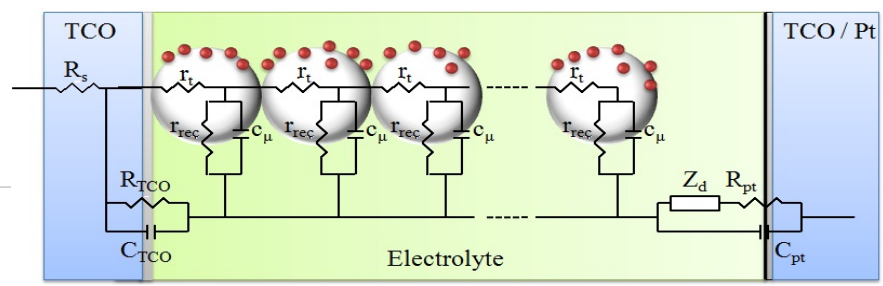

**Figure S3:** Equivalent circuit utilized to fit impedance data.

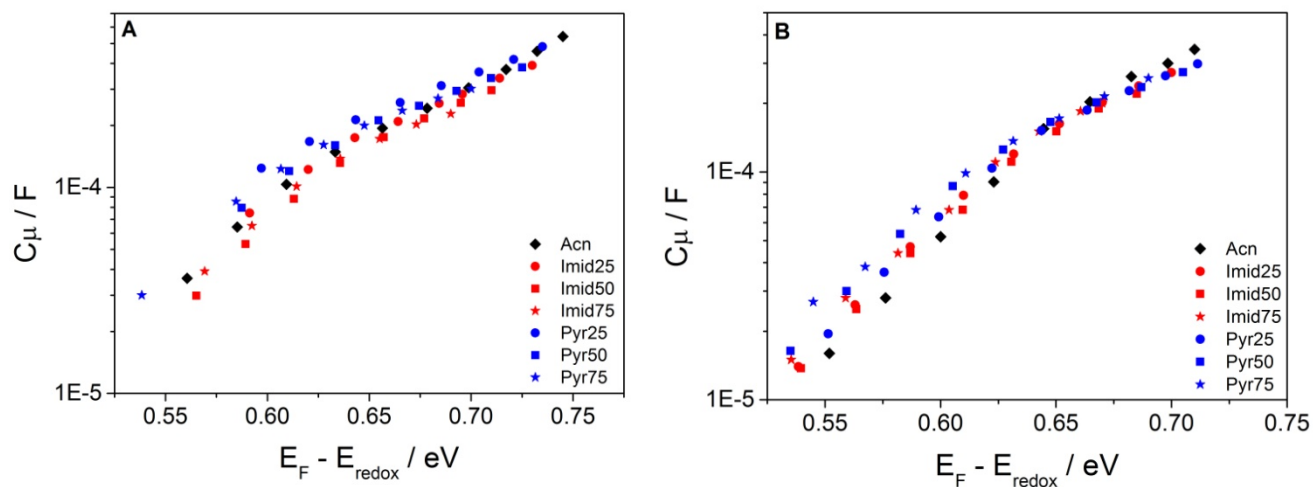

**Figure S4:** Chemical capacitance data as extracted from EIS measurement for (A) N719-cells and (B) Z907-cells.

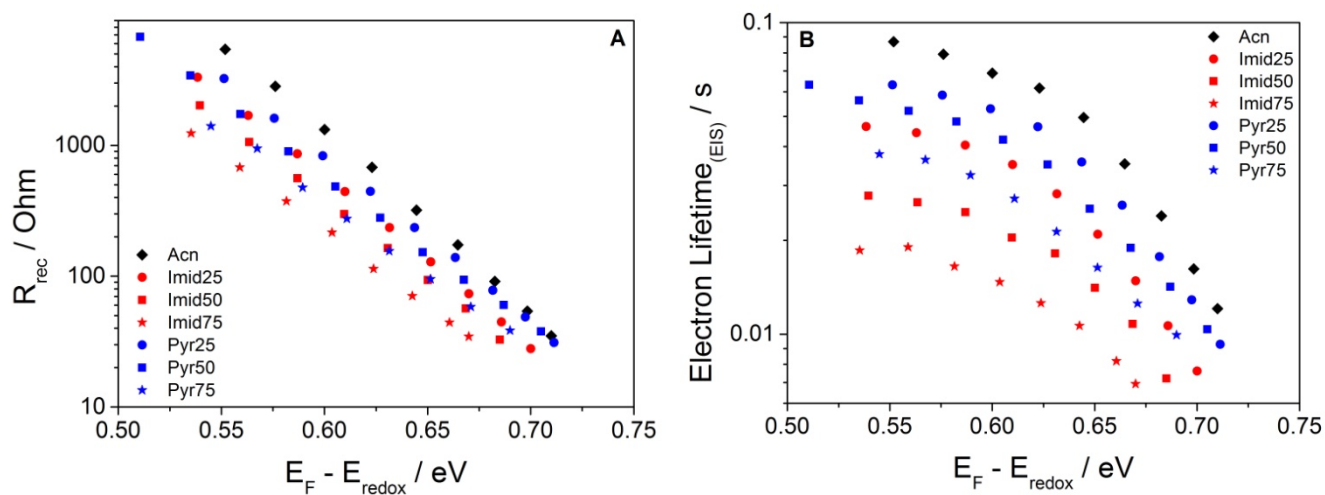

**Figure S5:** (A) Electron recombination resistance and (B) electron lifetime data are extracted from EIS measurement for Z907-cells

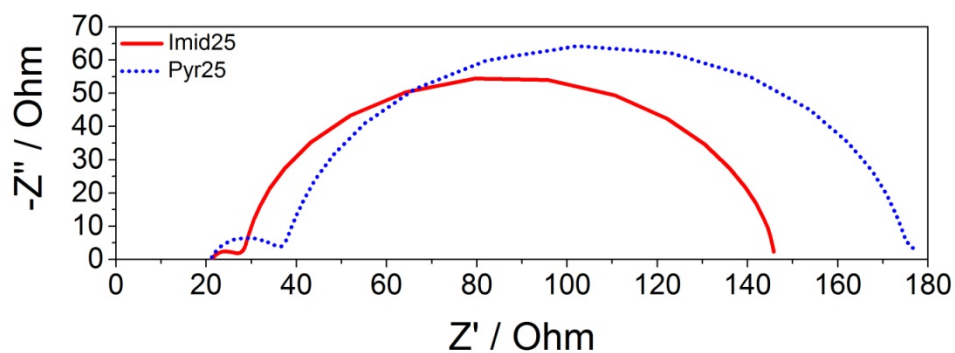

**Figure S6:** EIS Nyquist plots at 0.665mV for cells with Imid and Pry-based electrolytes in N719-cells of the same RTIL/Acn mixing ratio (25%).

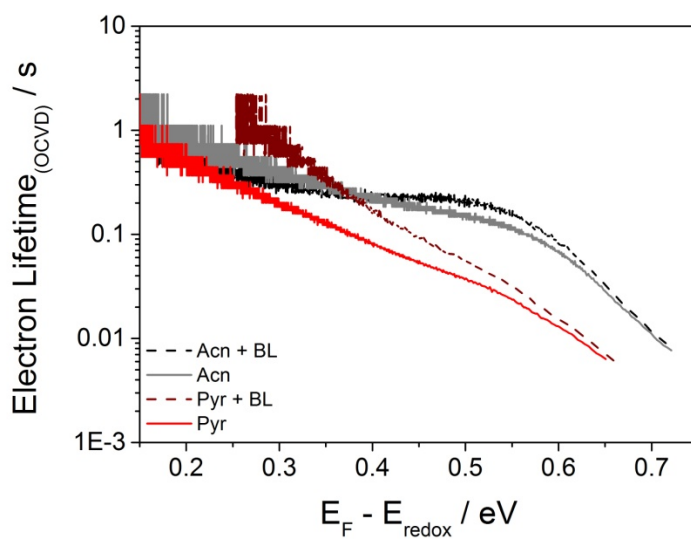

**Figure S7:** Electron lifetime data extracted by OCVD for Z907- cell with and without blocking layer (BL).

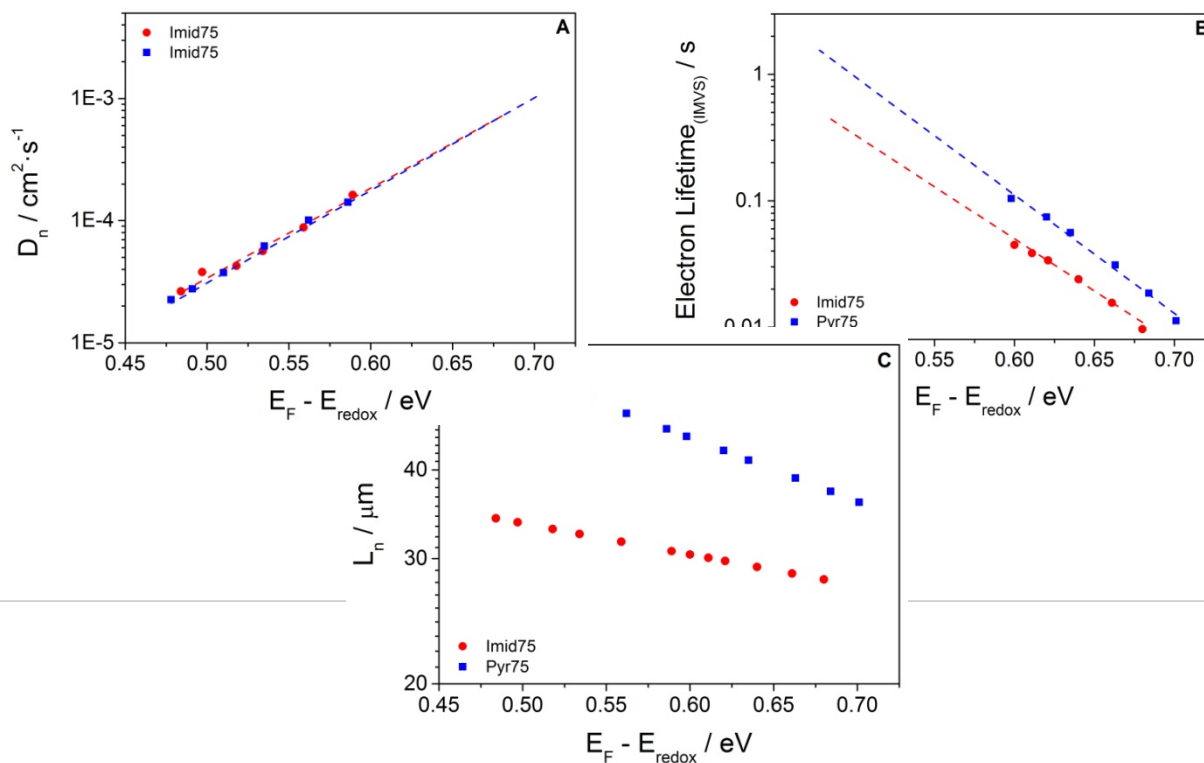

**Figure S8:** A) Electron diffusion coefficient obtained from IMPS, B) Electron lifetime obtained from IMVS and C) Electron Length diffusion obtained from IMVS and IMPS for Imid75 and Pyr75 in N719-cells.

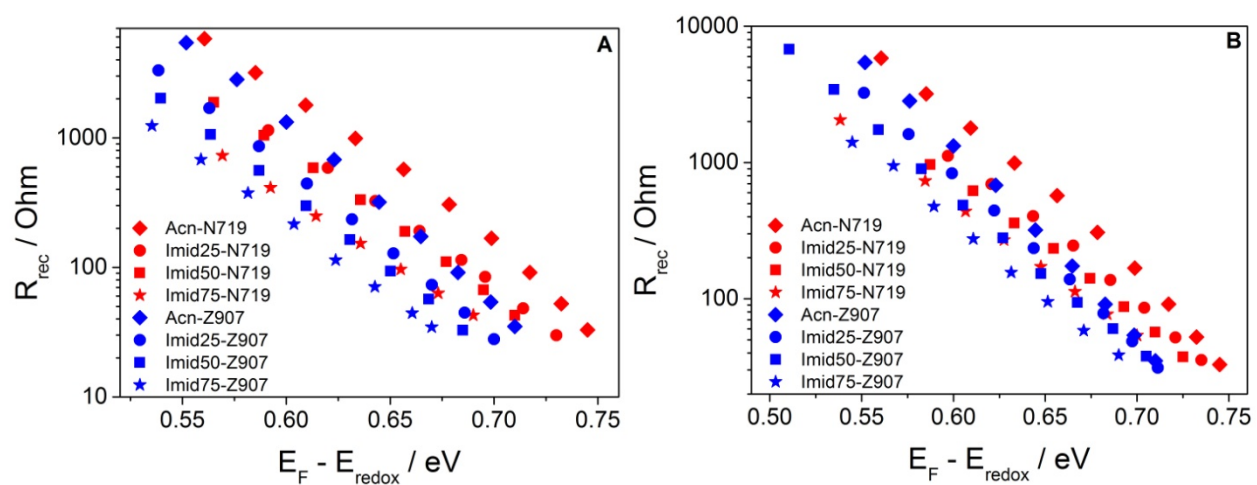

**Figure S9:** Electron recombination resistance extracted from EIS measurement for all (A) Imid/Acn and (B) Pyr/Acn mixing ratios in N719 and Z907-cells
